# Supplementary material for: Determination of Factors Associated with Natural Soil Suppressivity to Potato Common Scab
Source: PLoS One. 2015 Jan 22;10(1):e0116291. doi: 10.1371/journal.pone.0116291 (PMC4303419; doi:10.1371/journal.pone.0116291)
Supplement: S6 Table — (XLSX) [file pone.0116291.s006.xlsx]

## Sheet: TRFs_normalized
Table S6. T-RFLP profiles of actinobacterial communities in the bulk soil and potato tuberosphere at Zdirec site.
T-RF, sample	ZL_b1	ZL_b2	ZL_b3	ZL_b4	ZL_A1	ZL_A2	ZL_A3	ZL_A4	ZL_D1	ZL_D2	ZL_D3	ZL_D4	ZL_V1	ZL_V2	ZL_V3	ZL_V4	ZH_b1	ZH_b2	ZH_b3	ZH_b4	ZH_A1	ZH_A2	ZH_A4	ZH_D1	ZH_D2	ZH_D3	ZH_D4	ZH_V1	ZH_V2	ZH_V3
90	0.00500906				0.0162666	0.0155355	0.0152868		0.010286	0.0164495		0.00784537			0.00769397	0.0252747	0.0307521	0.0735496		0.01007				0.011713	0.113407			0.0593416	0.0922211	0.0180262
91
94																				0.00945597
96	0.00543536				0.0183655	0.00892464	0.00831601	0.0114812	0.0107381	0.0134228		0.00648096	0.00907629	0.0080156	0.00747724	0.0467033	0.0907744	0.0863408	0.0110939	0.03021	0.0140432	0.0219546	0.0248346	0.0362039	0.109082	0.0139826	0.0162799	0.0813588	0.10592	0.0394242
99																												0.00880688	0.0110078
100									0.00757319	0.0307935		0.01444	0.00758272	0.0139731	0.00671868
103			0.00718932		0.00918274		0.00525865					0.00648096	0.00850184	0.00617418				0.00822293				0.0102873			0.0254685			0.0119522	0.00758317
106																									0.00768861
108																									0.0297934			0.00775844	0.0066047
110				0.0244574
113	0.00937866	0.00822257	0.0106128		0.0198085	0.0156457	0.0160205	0.0234171	0.024076	0.0238189	0.0132532	0.0143263	0.0181526	0.0185225	0.014521			0.0708086		0.0222277	0.00957488	0.00715092			0.102835	0.00968968	0.0119062	0.0668903	0.0848826	0.0273635
115																	0.0674324								0.00672753
117																0.0142857	0.0140793	0.0150754						0.0141089	0.0269101			0.0146781	0.0222603
120												0.00795907												0.0196992
122	0.00756688		0.00855871		0.0131182	0.0128911	0.0125963	0.0140957	0.0126597	0.0322411		0.0191018		0.00779896	0.0114868	0.0203297	0.00815117	0.00822293			0.00957488	0.00940911		0.0118461		0.0100576	0.0122707	0.00985532	0.0129648
125			0.00570581							0.0203974
127	0.00543536		0.0103846		0.00865801
129	0.00809975	0.013066	0.0192856		0.0196773	0.00947554	0.0150422	0.0253496		0.0188183	0.0164437	0.012166	0.0126379	0.020364	0.0101864	0.0168498	0.0222305		0.0216718	0.0143682	0.0413635	0.0159328	0.0731312	0.0379342	0.00672753	0.0304183	0.0140931			0.0138763
131
134																0.0128205	0.0135235	0.0127912							0.0230658			0.0209688	0.0232387
136					0.00826446	0.00947554	0.00733765		0.00802532			0.00716316		0.0062825		0.0238095	0.0339014	0.0319781	0.00902993	0.00970158				0.0153068	0.0543008			0.0385825	0.0489237	0.0186746
138
140
142	0.00479591	0.00856049	0.00650462		0.0123311	0.0117893	0.0106396	0.0155735	0.0143551	0.0153968		0.011029	0.0102252	0.0110485	0.00899436	0.0188645	0.0305669	0.0420283		0.0108068				0.0106482	0.0701586			0.0404697	0.0396282	0.0201012
144																									0.00961076			0.00650031	0.00513699
148
149																						0.00627274
152	0.0120431	0.010588	0.00821636		0.0080021		0.0063593									0.00897436	0.00981845	0.0105071	0.00941692	0.00835073	0.00957488	0.00627274			0.00768861			0.00671	0.013454
154	0.0120431	0.00878576	0.00855871		0.00957628	0.0102468	0.0147976	0.0127316	0.010286	0.0222398		0.0143263	0.0157399	0.0126733	0.010078		0.0140793	0.0150754							0.0259491			0.0180331	0.0313112
156	0.00991154						0.00587012							0.00552426
158	0.00948524	0.0107006	0.00878695				0.00599242					0.00716316		0.00595754
160																0.0124542	0.0224157	0.0260393	0.0234778	0.0256662	0.0205541	0.0209509	0.0326969	0.0203647		0.0171716	0.0157939	0.00817782	0.0112524	0.0147841
162
165														0.0057409			0.0235272	0.0182732							0.0317155			0.0232753	0.0376712	0.0123201
166																									0.00864969				0.00758317
169
172															0.00671868	0.0234432												0.0109038	0.00489237
174																													0.00391389
177							0.00562554					0.00636725		0.00509099															0.00636008
178
180
182	0.00532879																								0.006247				0.00489237
184
186																0.0214286	0.0192664	0.0146185	0.0260578	0.0182979	0.025916	0.0158073	0.0605266	0.0268867	0.0148967	0.0285784	0.0170089	0.0138394	0.0149217	0.0256776
188
190
193			0.00593404																						0.00913023			0.0117425	0.00611546
194
197	0.0241927	0.0164451	0.0148351	0.090217	0.0198085	0.0449537	0.0243366	0.022735	0.0611507	0.0536913	0.023193	0.0526435	0.0296415	0.0213388	0.0301257	0.0190476	0.0270471	0.0447693	0.0277348	0.0276311	0.0954934	0.0656128	0.0247098	0.0222281	0.0148967	0.0542132	0.0659701	0.0354372	0.0432975	0.0383867
199	0.0201428	0.0154314	0.0186009	0.150956	0.0217762	0.0276554	0.0299621	0.0225077	0.0371877	0.0328991	0.0233157	0.0372939	0.0296415	0.0311958	0.0258994	0.0313187	0.0279733	0.0306076	0.0210268	0.0246838			0.0413079	0.0408625	0.0245074	0.0424384	0.0108128			0.0577098
200
202	0.0074603	0.0102501	0.0084446	0.0150632	0.00918274	0.0138828	0.0111288	0.0110265	0.0193286	0.0114489		0.0137578	0.0132123	0.0108319	0.00715215														0.00782779
204
206
208																				0.00773671									0.00440313
210														0.00509099	0.0082358	0.00952381
211
213
216																													0.00464775
218	0.00618139	0.00765938	0.0070752	0.0137674	0.00852683		0.00611471							0.010182														0.00859719	0.00611546
220	0.0107641															0.0135531			0.00980392	0.00970158				0.0110475	0.00720807	0.00883111		0.0132103	0.00562622
221																												0.00545188
223
226
229	0.0426303	0.0553052	0.0377725		0.0368621	0.0464963	0.0420692	0.0126179	0.0575336		0.0596392	0.0192155	0.0597426	0.0371534	0.0562419							0.0514365			0.0134551			0.0318725	0.015411
232	0.0963445	0.104753	0.100308	0.170392	0.106257	0.117012	0.111899	0.154257	0.117554	0.212265	0.103203	0.155202	0.114315	0.132366	0.126788	0.101099	0.0696554	0.0529922	0.103328	0.0836301	0.164433	0.130849	0.0497941	0.118861	0.0273907	0.12707	0.130482	0.0742294	0.0887965	0.106342
234	0.143025	0.144965	0.15497	0.2023	0.119638	0.121419	0.147487	0.135842	0.125127	0.126727	0.105166	0.110517	0.11489	0.0945624	0.111725	0.0512821	0.0539089	0.0511649	0.0940402	0.079946	0.0803013	0.0844311		0.0777319	0.0211437	0.0901509	0.0999879	0.04026		0.0980418
235	0.145476	0.174589	0.152802	0.194849	0.119376	0.115469	0.114345	0.112538	0.147169	0.12778	0.161247	0.129847	0.169462	0.122725	0.141959	0.102198	0.0555761	0.0516217	0.0839783	0.0846126	0.0778757	0.0997365	0.0396855	0.0955677	0.024988	0.0980007	0.109586	0.141749	0.0513699	0.108027
237	0.103059	0.113426	0.104188	0.0968578	0.0863177	0.0862715	0.0977131	0.0873025	0.0944953	0.0555336	0.169591	0.0819784	0.123162	0.0997617	0.123104	0.0357143	0.0287143	0.0105071	0.0887513	0.0723321	0.0600026	0.0697529	0.0304505	0.0705444		0.0614498	0.0668206	0.0165653		0.0431851
240	0.116807	0.102275	0.112975	0.0272109	0.102715	0.095747	0.0904977	0.0970785	0.0758449	0.0661929	0.0990306	0.0812962	0.0827206	0.105503	0.097746	0.0551282	0.0450167	0.0228415	0.135707	0.0954194	0.104685	0.080542	0.165481			0.0946891	0.0851658	0.0224366	0.0300881	0.0566723
242	0.0646915	0.0749043	0.0584275		0.0649351	0.0611503	0.0629815	0.0612709	0.0559512	0.0290828	0.094981	0.0645821	0.0758272	0.0519931	0.0736888	0.115201	0.104854	0.0863408	0.111971	0.143559	0.0942168	0.115167	0.133408	0.142553	0.0355598	0.0992273	0.130604	0.0427763	0.040362	0.105304
245	0.116594	0.102501	0.119137	0.0139294	0.148236	0.148744	0.121316	0.165397	0.0986775	0.0908014	0.117683	0.109608	0.0931756	0.138107	0.103598	0.196886	0.176547	0.188214	0.202399	0.192312	0.183327	0.169991	0.323974	0.215892	0.115329	0.189746	0.213218	0.0918432	0.0714286	0.196084
246																						0.00853092				0.00834049
247
251
252	0.00809975	0.0175715	0.0107269		0.0131182	0.0132217	0.0110065	0.0147778	0.0119815		0.0132532	0.00920978	0.0122932	0.0120234	0.00986129										0.0172994			0.00985532	0.00782779
254
256
258
260
262
266
268
270
272
274
275
276
279
282																		0.0077661	0.0117389										0.00880626
285																0.0124542	0.010189	0.0109639		0.0103156	0.00906422	0.00991093			0.00816915	0.00834049		0.00587125	0.0066047
286																0.0113553		0.00867976	0.00877193	0.00896476						0.00760456			0.00464775
288
290
292						0.0139929
294
296
298
299
300
ZH	Zdirec, high-severity field
VL	Zdirec, low-severity field
b1-b4	bulk soil
A1-A4	tuberosphere, cultivar Agria
D1-D4	tuberosphere, cultivar David
V1-V4	tuberosphere, cultivar Valfi
